# Supplementary material
Source: MDPI journal article supplement (https://www.mdpi.com/1999-4907/13/12/2063)
Supplement: s1 [file s1]

**Table S1:** Plastome sequences used for phylogenomic analysis. Species included in the comparative analysis are highlighted in green. The plastome generated in this study is in bold.

| Subgenera                           | Section & subsection             | Species                         | GenBank accession number |
|-------------------------------------|----------------------------------|---------------------------------|--------------------------|
| <i>Ficus</i> subg. <i>Ficus</i>     | <b>Sect. <i>Ficus</i></b>        |                                 |                          |
|                                     | Subsect. <i>Ficus</i>            | <i>Ficus carica</i>             | KY635880.1               |
|                                     | Subsect. <i>Frutescentiae</i>    | <i>Ficus erecta</i>             | MT093220.1               |
|                                     |                                  | <i>Ficus formosana</i>          | MW648426.1               |
|                                     |                                  | <i>Ficus heteromorpha</i>       | MW039145.1               |
|                                     |                                  | <i>Ficus tikoua</i>             | MT075555.1               |
|                                     |                                  | <i>Ficus ischnopoda</i>         | ON711004.1               |
|                                     |                                  | <i>Ficus pandurata</i>          | OL639015.1               |
|                                     | Subsect. <i>Eriosycea</i>        | <b><i>Ficus hirta</i></b>       | <b>MN364706.1</b>        |
|                                     |                                  | <i>Ficus langkokensis</i>       | ON711005.1               |
| <i>Ficus</i> subg. <i>Sycidium</i>  | <b>Sect. <i>Palaeomorphe</i></b> | <i>Ficus tinctoria</i>          | ON711012.1               |
| <i>Ficus</i> subg. <i>Sycomorus</i> | <b>Sect. <i>Hemicardia</i></b>   | <i>Ficus heterostyla</i>        | OK077762.1               |
|                                     | <b>Sect. <i>Sycocarpus</i></b>   |                                 |                          |
|                                     | Subsect. <i>Macrostyla</i>       | <i>Ficus squamosa</i>           | OK077764.1               |
|                                     | Subsect. <i>Neomorphe</i>        | <i>Ficus auriculata</i>         | OK078618                 |
|                                     |                                  | <i>Ficus beipeiensis</i>        | MT611420.1               |
|                                     |                                  | <i>Ficus oligodon</i>           | OK077763.1               |
|                                     | Subsect. <i>Sycomorus</i>        | <b><i>Ficus racemosa</i></b>    | <b>KT368151.1</b>        |
| <i>Ficus</i> subg. <i>Synoecia</i>  | <b>Sect. <i>Rhizocladus</i></b>  |                                 |                          |
|                                     | Subsect. <i>Plagiostigma</i>     | <i>Ficus dinganensis</i>        | OK375500.1               |
|                                     |                                  | <i>Ficus pumila</i>             | MZ351203.1               |
|                                     |                                  | <b><i>Ficus sarmentosa</i></b>  | <b>OL415083.1</b>        |
| <i>Ficus</i> subg. <i>Urostigma</i> | <b>Sect. <i>Galoglychia</i></b>  |                                 |                          |
|                                     | Subsect. <i>Cyathistipulae</i>   | <i>Ficus lyrata</i>             | MW039148.1               |
|                                     | Subsect. <i>Platyphyllae</i>     | <b><i>Ficus populifolia</i></b> | <b>OP132395.1</b>        |
|                                     | <b>Sect. <i>Urostigma</i></b>    |                                 |                          |
|                                     | Subsect. <i>Conosycea</i>        | <i>Ficus altissima</i>          | MW043478.1               |
|                                     |                                  | <i>Ficus benamina</i>           | MW039146.1               |
|                                     |                                  | <i>Ficus curtipes</i>           | NC_053833.1              |
|                                     |                                  | <i>Ficus microcarpa</i>         | NC_053834.1              |
|                                     | Subsect. <i>Urostigma</i>        | <b><i>Ficus concinna</i></b>    | <b>MZ128521.1</b>        |
|                                     |                                  | <i>Ficus religiosa</i>          | NC_033979                |
|                                     |                                  | <i>Ficus virens</i>             | MW039142.1               |
| Outgroup<br>family Flacourtiaceae   |                                  | <i>Flacourtia indica</i>        | MN078145.1               |
|                                     |                                  | <i>Homalium ceylanicum</i>      | NC_045235.1              |
|                                     |                                  | <i>Poliothyrsis sinensis</i>    | NC_037412.1              |

**Table S2:** List of genes encoded by *Ficus populifolia* plastome.

| Category                 | Group of genes                        | Name of genes                                                                                                                                                                                                                                                                                                                                                                                                                                                                                                                                                                                                                                                                                                                                                                  | Number |
|--------------------------|---------------------------------------|--------------------------------------------------------------------------------------------------------------------------------------------------------------------------------------------------------------------------------------------------------------------------------------------------------------------------------------------------------------------------------------------------------------------------------------------------------------------------------------------------------------------------------------------------------------------------------------------------------------------------------------------------------------------------------------------------------------------------------------------------------------------------------|--------|
| Self-replication         | ribosomal RNA genes (rRNA)            | <i>rrn5</i> <sup>(X2)</sup> , <i>rrn4.5</i> <sup>(X2)</sup> , <i>rrn16</i> <sup>(X2)</sup> ,<br><i>rrn23</i> <sup>(X2)</sup>                                                                                                                                                                                                                                                                                                                                                                                                                                                                                                                                                                                                                                                   | 8 (4)  |
|                          | Transfer RNA genes (tRNA)             | <i>trnH</i> -GUG, <i>trnK</i> -UUU <sup>+</sup> , <i>trnQ</i> -UUG,<br><i>trnS</i> -GCU, <i>trnG</i> -UCC <sup>+</sup> , <i>trnR</i> -UCU,<br><i>trnC</i> -GCA, <i>trnD</i> -GUC, <i>trnY</i> -GUA,<br><i>trnE</i> -UUC, <i>trnT</i> -GGU, <i>trnS</i> -UGA,<br><i>trnG</i> -GCC, <i>trnM</i> -CAU, <i>trnfm</i> -CAU,<br><i>trnS</i> -GGA, <i>trnT</i> -UGU, <i>trnL</i> -UAA <sup>+</sup> ,<br><i>trnF</i> -GAA, <i>trnV</i> -UAC <sup>+</sup> , <i>trnW</i> -CCA,<br><i>trnP</i> -UGG, <i>trnI</i> -CAU <sup>(X2)</sup> , <i>trnL</i> -<br>CAA <sup>(X2)</sup> , <i>trnV</i> -GAC <sup>(X2)</sup> , <i>trnI</i> -GAU <sup>+,(X2)</sup> ,<br><i>trnA</i> -UGC <sup>+,(X2)</sup> , <i>trnR</i> -ACG <sup>(X2)</sup> , <i>trnN</i> -<br>GUU <sup>(X2)</sup> , <i>trnL</i> -UAG | 37 (7) |
|                          | Small subunit of ribosome             | <i>rps2</i> , <i>rps3</i> , <i>rps4</i> , <i>rps7</i> <sup>(X2)</sup> , <i>rps8</i> , <i>rps11</i> ,<br><i>rps12</i> <sup>+,(X2)</sup> , <i>rps14</i> , <i>rps15</i> , <i>rps16</i> <sup>+</sup> ,<br><i>rps18</i> , <i>rps19</i>                                                                                                                                                                                                                                                                                                                                                                                                                                                                                                                                              | 14 (2) |
|                          | Large subunit of ribosome             | <i>rpl2</i> <sup>+,(X2)</sup> , <i>rpl14</i> , <i>rpl16</i> <sup>+</sup> , <i>rpl20</i> , <i>rpl22</i> ,<br><i>rpl23</i> <sup>(X2)</sup> , <i>rpl32</i> , <i>rpl33</i> , <i>rpl36</i>                                                                                                                                                                                                                                                                                                                                                                                                                                                                                                                                                                                          | 11 (2) |
|                          | DNA-dependent RNA polymerase          | <i>rpoA</i> , <i>rpoB</i> , <i>rpoC1</i> <sup>+</sup> , <i>rpoC2</i>                                                                                                                                                                                                                                                                                                                                                                                                                                                                                                                                                                                                                                                                                                           | 4      |
| Genes for photosynthesis | Photosystem I                         | <i>psaA</i> , <i>psaB</i> , <i>psaC</i> , <i>psaI</i> , <i>psaJ</i> , <i>ycf3</i> <sup>++</sup>                                                                                                                                                                                                                                                                                                                                                                                                                                                                                                                                                                                                                                                                                | 6      |
|                          | Photosystem II                        | <i>psbA</i> , <i>psbB</i> , <i>psbC</i> , <i>psbD</i> , <i>psbE</i> , <i>psbF</i> ,<br><i>psbH</i> , <i>psbI</i> , <i>psbJ</i> , <i>psbK</i> , <i>psbL</i> , <i>psbM</i> ,<br><i>psbN</i> , <i>psbT</i> , <i>psbZ</i> ,                                                                                                                                                                                                                                                                                                                                                                                                                                                                                                                                                        | 15     |
|                          | Subunits of cytochrome b/f complex    | <i>petA</i> , <i>petB</i> <sup>+</sup> , <i>petD</i> <sup>+</sup> , <i>petG</i> , <i>petL</i> , <i>petN</i>                                                                                                                                                                                                                                                                                                                                                                                                                                                                                                                                                                                                                                                                    | 6      |
|                          | Subunits of ATP synthase              | <i>atpA</i> , <i>atpB</i> , <i>atpE</i> , <i>atpF</i> <sup>+</sup> , <i>atpH</i> , <i>atpI</i>                                                                                                                                                                                                                                                                                                                                                                                                                                                                                                                                                                                                                                                                                 | 6      |
|                          | Subunits of rubisco                   | <i>rbcL</i>                                                                                                                                                                                                                                                                                                                                                                                                                                                                                                                                                                                                                                                                                                                                                                    | 1      |
|                          | Subunits of NADH-dehydrogenase        | <i>ndhA</i> <sup>+</sup> , <i>ndhB</i> <sup>+(X2)</sup> , <i>ndhC</i> , <i>ndhD</i> , <i>ndhE</i> ,<br><i>ndhF</i> , <i>ndhG</i> , <i>ndhH</i> , <i>ndhI</i> , <i>ndhJ</i> ,<br><i>ndhK</i> <sup>+</sup>                                                                                                                                                                                                                                                                                                                                                                                                                                                                                                                                                                       | 12 (1) |
| Other genes              | Chloroplast envelope membrane protein | <i>cemA</i>                                                                                                                                                                                                                                                                                                                                                                                                                                                                                                                                                                                                                                                                                                                                                                    | 1      |
|                          | Maturase                              | <i>matK</i>                                                                                                                                                                                                                                                                                                                                                                                                                                                                                                                                                                                                                                                                                                                                                                    | 1      |

|                                  |                                        |                                                 |          |
|----------------------------------|----------------------------------------|-------------------------------------------------|----------|
|                                  | <b>Protease</b>                        | <i>clpP</i> <sup>++</sup>                       | 1        |
|                                  | <b>Subunit acetyl-coA carboxylase</b>  | <i>accD</i>                                     | 1        |
|                                  | <b>C-type cytochrome synthesis</b>     | <i>ccsA</i>                                     | 1        |
|                                  | <b>Translational initiation factor</b> | <i>infA</i>                                     | 1        |
| <b>Genes of unknown function</b> | <b>Conserved open reading frames</b>   | <i>ycf1, ycf2</i> <sup>(X2)</sup> , <i>ycf4</i> | 4 (1)    |
| <b>Total</b>                     |                                        |                                                 | 130 (17) |

+ Gene with one intron, ++ gene with two introns, (×2) indicates that the number of the repeat unit is 2, parentheses indicate the number of duplicated genes

**Table S3:** Codon-anticodon recognition patterns and codon usage of the *F. populifolia* plastome.

| Codon | Amino acid | count | RSCU | tRNA             | Codon | Amino acid | count | RSCU | tRNA             |
|-------|------------|-------|------|------------------|-------|------------|-------|------|------------------|
| UUU   | Phe        | 2376  | 1.31 | <i>trnF</i> -GAA | UAU   | Tyr        | 1659  | 1.62 | <i>trnY</i> -GUA |
| UUC   | Phe        | 1407  | 0.69 |                  | UAC   | Tyr        | 783   | 0.38 |                  |
| UUA   | Leu        | 1366  | 1.79 | <i>trnL</i> -UAA | UAA   | Stop       | 1421  | 0    |                  |
| UUG   | Leu        | 1062  | 1.23 | <i>trnL</i> -CAA | UAG   | Stop       | 831   | 0    |                  |
| CUU   | Leu        | 1234  | 1.31 | <i>trnL</i> -UAG | CAU   | His        | 959   | 1.54 | <i>trnH</i> -GUG |
| CUC   | Leu        | 696   | 0.43 |                  | CAC   | His        | 389   | 0.46 |                  |
| CUA   | Leu        | 891   | 0.84 |                  | CAA   | Gln        | 1077  | 1.56 | <i>trnQ</i> -UUG |
| CUG   | Leu        | 499   | 0.4  |                  | CAG   | Gln        | 475   | 0.44 |                  |
| AUU   | Ile        | 1940  | 1.42 |                  | AAU   | Asn        | 1911  | 1.53 | <i>trnN</i> -GUU |
| AUC   | Ile        | 1159  | 0.59 |                  | AAC   | Asn        | 744   | 0.47 |                  |
| AUA   | Ile        | 1734  | 0.99 | <i>trnI</i> -CAU | AAA   | Lys        | 2329  | 1.47 |                  |
| AUG   | Met        | 869   | 1    | <i>trnM</i> -CAU | AAG   | Lys        | 1037  | 0.53 |                  |
| GUU   | Val        | 859   | 1.45 | <i>trnV</i> -GAC | GAU   | Asp        | 1030  | 1.61 | <i>trnD</i> -GUC |
| GUC   | Val        | 424   | 0.48 |                  | GAC   | Asp        | 419   | 0.39 |                  |
| GUA   | Val        | 801   | 1.53 |                  | GAA   | Glu        | 1341  | 1.5  | <i>trnE</i> -UUC |
| GUG   | Val        | 437   | 0.55 |                  | GAG   | Glu        | 612   | 0.5  |                  |
| UCU   | Ser        | 1145  | 1.7  | <i>trnS</i> -GGA | UGU   | Cys        | 707   | 1.5  | <i>trnC</i> -GCA |
| UCC   | Ser        | 824   | 0.97 |                  | UGC   | Cys        | 436   | 0.5  |                  |
| UCA   | Ser        | 952   | 1.28 |                  | UGA   | Stop       | 1040  | 0    |                  |
| UCG   | Ser        | 563   | 0.56 | <i>trnS</i> -UGA | UGG   | Trp        | 677   | 1    | <i>trnW</i> -CCA |
| CCU   | Pro        | 623   | 1.56 | <i>trnP</i> -UGG | CGU   | Arg        | 361   | 1.18 | <i>trnR</i> -ACG |
| CCC   | Pro        | 539   | 0.69 |                  | CGC   | Arg        | 222   | 0.36 | <i>trnR</i> -UCU |
| CCA   | Pro        | 743   | 1.18 |                  | CGA   | Arg        | 505   | 1.39 |                  |
| CCG   | Pro        | 386   | 0.57 |                  | CGG   | Arg        | 369   | 0.38 |                  |
| ACU   | Thr        | 666   | 1.62 |                  | AGA   | Arg        | 656   | 2    |                  |
| ACC   | Thr        | 537   | 0.72 |                  | AGG   | Arg        | 418   | 0.69 |                  |
| ACA   | Thr        | 716   | 1.22 | <i>trnT</i> -GGU | AGU   | Ser        | 1050  | 1.13 | <i>trnS</i> -GCU |
| ACG   | Thr        | 361   | 0.44 | <i>trnT</i> -UGU | AGC   | Ser        | 584   | 0.36 |                  |
| GCU   | Ala        | 461   | 1.86 | <i>trnA</i> -UGC | GGU   | Gly        | 523   | 1.27 |                  |
| GCC   | Ala        | 369   | 0.58 |                  | GGC   | Gly        | 336   | 0.4  | <i>trnG</i> -GCC |
| GCA   | Ala        | 473   | 1.15 |                  | GGA   | Gly        | 752   | 1.67 |                  |
| GCG   | Ala        | 235   | 0.41 |                  | GGG   | Gly        | 535   | 0.66 |                  |

**Table S4:** Predicted RNA editing site in the *F. populifolia* plastome.

| Gene         | Nucleotide Position | Amino Acid Position | Codon Conversion | Amino Acid Conversion | Score |
|--------------|---------------------|---------------------|------------------|-----------------------|-------|
| <i>accD</i>  | 13                  | 5                   | CGG => TGG       | R => W                | 1     |
|              | 344                 | 115                 | CCA => CTA       | P => L                | 1     |
|              | 1421                | 474                 | CCT => CTT       | P => L                | 1     |
| <i>atpA</i>  | 779                 | 260                 | TCA => TTA       | S => L                | 1     |
|              | 797                 | 266                 | CCT => CTT       | P => L                | 1     |
|              | 920                 | 307                 | TCA => TTA       | S => L                | 1     |
| <i>atpB</i>  | 37                  | 13                  | CCC => TCC       | P => S                | 1     |
| <i>atpF</i>  | 19                  | 7                   | CCT => TCT       | P => S                | 0.86  |
| <i>atpI</i>  | 76                  | 26                  | CTC => TTC       | L => F                | 0.86  |
| <i>clpP</i>  | 559                 | 187                 | CAC => TAC       | H => Y                | 1     |
|              | 52                  | 18                  | CTC => TTC       | L => F                | 1     |
|              | 640                 | 214                 | CAT => TAT       | H => Y                | 1     |
| <i>matK</i>  | 1187                | 396                 | TCA => TTA       | S => L                | 0.86  |
|              | 107                 | 36                  | CCT => CTT       | P => L                | 1     |
|              | 341                 | 114                 | TCA => TTA       | S => L                | 1     |
| <i>ndhA</i>  | 566                 | 189                 | TCA => TTA       | S => L                | 1     |
|              | 1073                | 358                 | TCC => TTC       | S => F                | 1     |
|              | 149                 | 50                  | TCA => TTA       | S => L                | 1     |
| <i>ndhB</i>  | 467                 | 156                 | CCA => CTA       | P => L                | 1     |
|              | 542                 | 181                 | ACG => ATG       | T => M                | 1     |
|              | 586                 | 196                 | CAT => TAT       | H => Y                | 1     |
| <i>ndhD</i>  | 611                 | 204                 | TCA => TTA       | S => L                | 0.8   |
|              | 737                 | 246                 | CCA => CTA       | P => L                | 1     |
|              | 746                 | 249                 | TCT => TTT       | S => F                | 1     |
| <i>rpoB</i>  | 830                 | 277                 | TCA => TTA       | S => L                | 1     |
|              | 836                 | 279                 | TCA => TTA       | S => L                | 1     |
|              | 1112                | 371                 | TCA => TTA       | S => L                | 1     |
| <i>rpoCI</i> | 1255                | 419                 | CAT => TAT       | H => Y                | 1     |
|              | 1291                | 431                 | CTC => TTC       | L => F                | 1     |
|              | 1481                | 494                 | CCA => CTA       | P => L                | 1     |
| <i>rpoD</i>  | 20                  | 7                   | ACG => ATG       | T => M                | 1     |
|              | 331                 | 111                 | CGG => TGG       | R => W                | 0.8   |
|              | 401                 | 134                 | CCA => CTA       | P => L                | 1     |
| <i>rpoE</i>  | 617                 | 206                 | TCA => TTA       | S => L                | 1     |
|              | 692                 | 231                 | TCG => TTG       | S => L                | 1     |
|              | 896                 | 299                 | TCA => TTA       | S => L                | 1     |
| <i>rpoF</i>  | 905                 | 302                 | CCT => CTT       | P => L                | 1     |
|              | 1094                | 365                 | GCT => GTT       | A => V                | 1     |
|              | 1316                | 439                 | TCA => TTA       | S => L                | 0.8   |
| <i>rpoH</i>  | 1423                | 475                 | CTT => TTT       | L => F                | 0.8   |
|              | 338                 | 113                 | TCT => TTT       | S => F                | 1     |
|              | 2426                | 809                 | TCA => TTA       | S => L                | 0.86  |
| <i>rpoI</i>  | 41                  | 14                  | TCA => TTA       | S => L                | 1     |

|              |      |     |            |        |      |
|--------------|------|-----|------------|--------|------|
|              | 1562 | 521 | ACG => ATG | T => M | 0.86 |
|              | 1505 | 502 | ACG => ATG | T => M | 0.86 |
| <i>rpoC2</i> | 1612 | 538 | CTT => TTT | L => F | 1    |
|              | 1807 | 603 | CGT => TGT | R => C | 0.86 |
|              | 1987 | 663 | CTT => TTT | L => F | 0.83 |
| <i>rps14</i> | 80   | 27  | TCA => TTA | S => L | 1    |
| <i>rps16</i> | 212  | 71  | TCA => TTA | S => L | 0.83 |
| <i>rps2</i>  | 248  | 83  | TCA => TTA | S => L | 1    |

---

**Table S5:** Repeat sequences present in the *F. populifolia* plastome.

| Repeat Size | Repeat Position 1 | Repeat Type | Repeat Location  | Repeat Position 2 | Repeat Location  | E-value  |
|-------------|-------------------|-------------|------------------|-------------------|------------------|----------|
| 39          | 46581             | F           | <i>ycf3</i>      | 103014            | IGS              | 2.40E-14 |
| 39          | 46581             | P           | <i>ycf3</i>      | 146234            | IGS              | 2.40E-14 |
| 33          | 353               | P           | IGS              | 392               | IGS              | 9.83E-11 |
| 31          | 93636             | F           | <i>ycf2</i>      | 93657             | <i>ycf2</i>      | 1.57E-09 |
| 31          | 93636             | P           | <i>ycf2</i>      | 155599            | <i>ycf2</i>      | 1.57E-09 |
| 31          | 93657             | P           | <i>ycf2</i>      | 155620            | <i>ycf2</i>      | 1.57E-09 |
| 31          | 155599            | F           | <i>ycf2</i>      | 155620            | <i>ycf2</i>      | 1.57E-09 |
| 30          | 9061              | P           | IGS              | 48392             | <i>trnS</i> -GGA | 6.29E-09 |
| 30          | 31819             | P           | IGS              | 31819             | IGS              | 6.29E-09 |
| 29          | 49494             | R           | IGS              | 49494             | IGS              | 2.52E-08 |
| 27          | 29135             | P           | IGS              | 29166             | IGS              | 4.03E-07 |
| 26          | 10726             | P           | IGS              | 10756             | IGS              | 1.61E-06 |
| 26          | 50037             | P           | IGS              | 50037             | IGS              | 1.61E-06 |
| 26          | 60776             | P           | IGS              | 60776             | IGS              | 1.61E-06 |
| 25          | 34106             | P           | IGS              | 34132             | IGS              | 6.44E-06 |
| 25          | 60211             | F           | <i>rbcL</i>      | 60236             | <i>rbcL</i>      | 6.44E-06 |
| 25          | 78886             | P           | IGS              | 78912             | IGS              | 6.44E-06 |
| 25          | 112280            | P           | IGS              | 112308            | IGS              | 6.44E-06 |
| 25          | 112280            | F           | IGS              | 136954            | IGS              | 6.44E-06 |
| 25          | 112308            | F           | IGS              | 136982            | IGS              | 6.44E-06 |
| 25          | 136954            | P           | IGS              | 136982            | IGS              | 6.44E-06 |
| 24          | 7559              | P           | IGS              | 7559              | IGS              | 2.58E-05 |
| 23          | 46581             | F           | <i>ycf3</i>      | 126352            | <i>ndhA</i>      | 1.03E-04 |
| 23          | 103014            | F           | IGS              | 126352            | <i>ndhA</i>      | 1.03E-04 |
| 23          | 126352            | P           | <i>ndhA</i>      | 146250            | IGS              | 1.03E-04 |
| 22          | 3875              | P           | <i>trnK</i> -UUU | 3875              | <i>trnK</i> -UUU | 4.12E-04 |
| 22          | 5892              | P           | <i>rps16</i>     | 95589             | <i>ycf2</i>      | 4.12E-04 |
| 22          | 5892              | F           | <i>rps16</i>     | 153676            | <i>ycf2</i>      | 4.12E-04 |
| 22          | 6901              | P           | IGS              | 6901              | IGS              | 4.12E-04 |
| 22          | 10651             | F           | <i>trnG</i> -UCC | 39272             | <i>trnG</i> -GCC | 4.12E-04 |
| 22          | 33358             | P           | IGS              | 33358             | IGS              | 4.12E-04 |
| 22          | 38071             | P           | <i>trnS</i> -UGA | 48334             | IGS              | 4.12E-04 |
| 22          | 64904             | P           | IGS              | 64904             | IGS              | 4.12E-04 |
| 22          | 126520            | P           | <i>ndhA</i>      | 126520            | <i>ndhA</i>      | 4.12E-04 |
| 21          | 4712              | F           | IGS              | 4725              | IGS              | 1.65E-03 |
| 21          | 9067              | F           | <i>trnS</i> -GCU | 38005             | <i>trnS</i> -UGA | 1.65E-03 |
| 21          | 38005             | P           | <i>trnS</i> -UGA | 48395             | <i>trnS</i> -GGA | 1.65E-03 |
| 21          | 67629             | F           | IGS              | 67647             | IGS              | 1.65E-03 |
| 21          | 74780             | F           | <i>clpP1</i>     | 74799             | <i>clpP1</i>     | 1.65E-03 |
| 21          | 84069             | R           | IGS              | 84069             | IGS              | 1.65E-03 |
| 21          | 117645            | R           | IGS              | 117645            | IGS              | 1.65E-03 |

|    |        |   |             |        |                  |          |
|----|--------|---|-------------|--------|------------------|----------|
| 21 | 123071 | P | IGS         | 123093 | IGS              | 1.65E-03 |
| 20 | 33449  | P | IGS         | 33449  | IGS              | 6.60E-03 |
| 20 | 39056  | R | IGS         | 75828  | <i>clpP1</i>     | 6.60E-03 |
| 20 | 52638  | P | IGS         | 69574  | IGS              | 6.60E-03 |
| 20 | 54254  | R | <i>ndhC</i> | 54254  | <i>ndhC</i>      | 6.60E-03 |
| 20 | 58367  | P | IGS         | 114585 | <i>ycf1,ndhF</i> | 6.60E-03 |
| 20 | 69763  | P | IGS         | 69763  | IGS              | 6.60E-03 |
| 20 | 84706  | P | <i>rps8</i> | 84706  | <i>rps8</i>      | 6.60E-03 |

---

**Table S6** : SSRs detected in five *Ficus* plastomes.

| SSR type | Repeat Unit   | <i>F. populifolia</i> | <i>F. concinna</i> | <i>F. hirta</i> | <i>F. racemosa</i> | <i>F. sarmentosa</i> |
|----------|---------------|-----------------------|--------------------|-----------------|--------------------|----------------------|
| Mono     | A             | 63                    | 63                 | 61              | 58                 | 56                   |
|          | C             | 2                     | 1                  | 2               | 1                  | 3                    |
|          | G             | 2                     | 1                  | 1               | 1                  | 2                    |
|          | T             | 89                    | 90                 | 81              | 88                 | 79                   |
| Di       | AG/CT         | 1                     | 1                  | 1               | 1                  | 1                    |
|          | AT/AT         | 17                    | 18                 | 21              | 18                 | 20                   |
| Tri      | AAG/CTT       | 1                     | 1                  | 1               | 1                  | 1                    |
|          | AAT/ATT       | 2                     | 3                  | 4               | 3                  | 3                    |
|          | AAAG/CTTT     | 2                     | 2                  | 2               | 2                  | 2                    |
| Tetra    | AAAT/ATTT     | 4                     | 7                  | 5               | 4                  | 7                    |
|          | AATT/AATT     | 1                     | 1                  | 1               | 1                  | 1                    |
|          | AGAT/ATCT     | 1                     | 1                  | 1               | 1                  | 1                    |
|          | AAAC/GTTT     | 0                     | 1                  | 0               | 0                  | 0                    |
|          | AAAGG/CCTTT   | 1                     | 1                  | 1               | 1                  | 1                    |
| Penta    | AATTC/AATTG   | 0                     | 1                  | 1               | 1                  | 1                    |
|          | AAAAT/ATTTT   | 0                     | 0                  | 1               | 1                  | 1                    |
| Hexa     | AAGGAG/CCTTCT | 0                     | 0                  | 2               | 0                  | 0                    |
| total    |               | 186                   | 192                | 186             | 182                | 179                  |

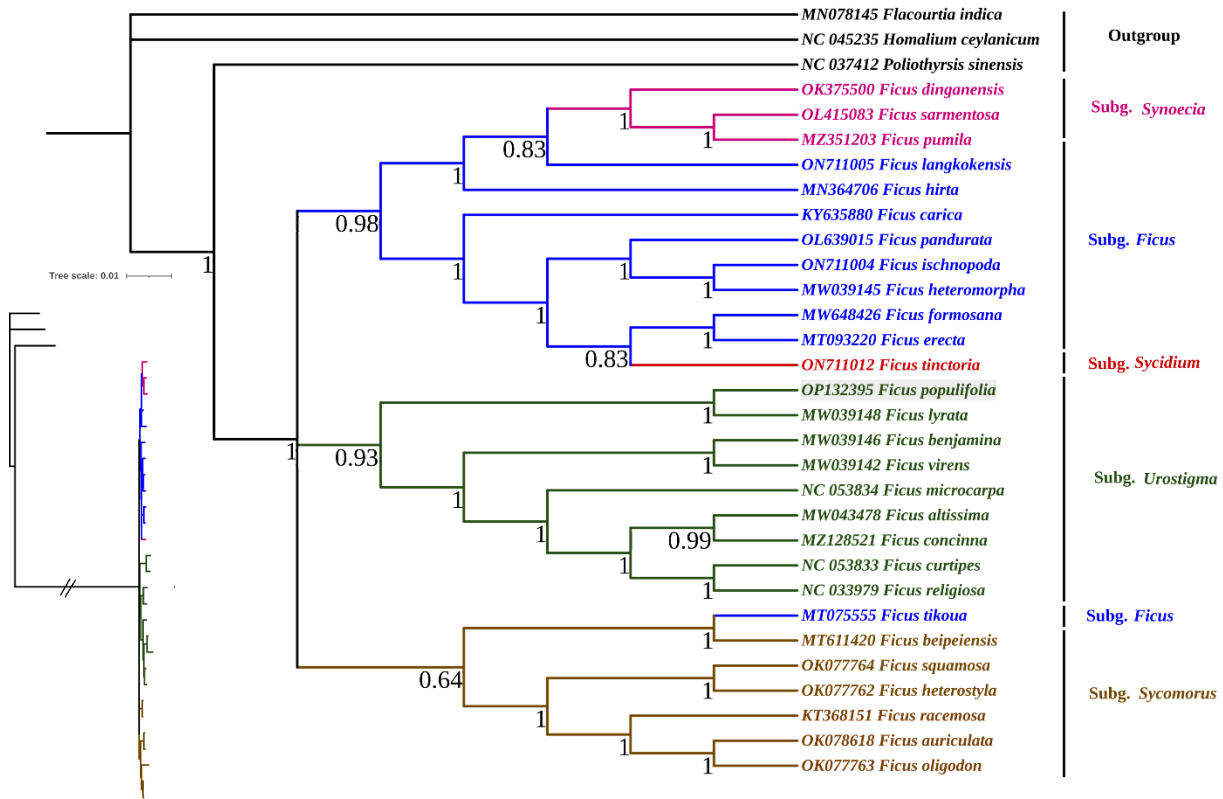

**Figure S1.** Phylogenomic relationship of 28 *Ficus* species based on 78 coding genes inferred from BI analysis. Bayesian posterior probabilities are present below the lines.
